# Supplementary material
Source: PubMed Central journal article supplement (PMC3397154)
Supplement: NIHMS379169-supplement-Supplementary_File.pdf [file NIHMS379169-supplement-Supplementary_File.pdf]

**Figure S1. Alternative approach for supplying marine natural products (MNPs).**

Left, the traditional method for obtaining MNPs: large amounts of the biological sample are collected and chemically extracted. New or known metabolites are then subjected to structural elucidation studies. Right, our alternative strategy for supplying MNPs: a much smaller sample is required (milligrams). This sample is divided in two portions; one is used for chemical extraction and subjected to HRMS analysis while the other is used for DNA extraction and PCR. After structural prediction, the pathway is cloned and heterologously expressed in *E. coli* to produce the natural product. Additionally, rational genetic engineering in the same system can be used to produce natural derivatives with unknown genes or unnatural derivatives for lead optimization.

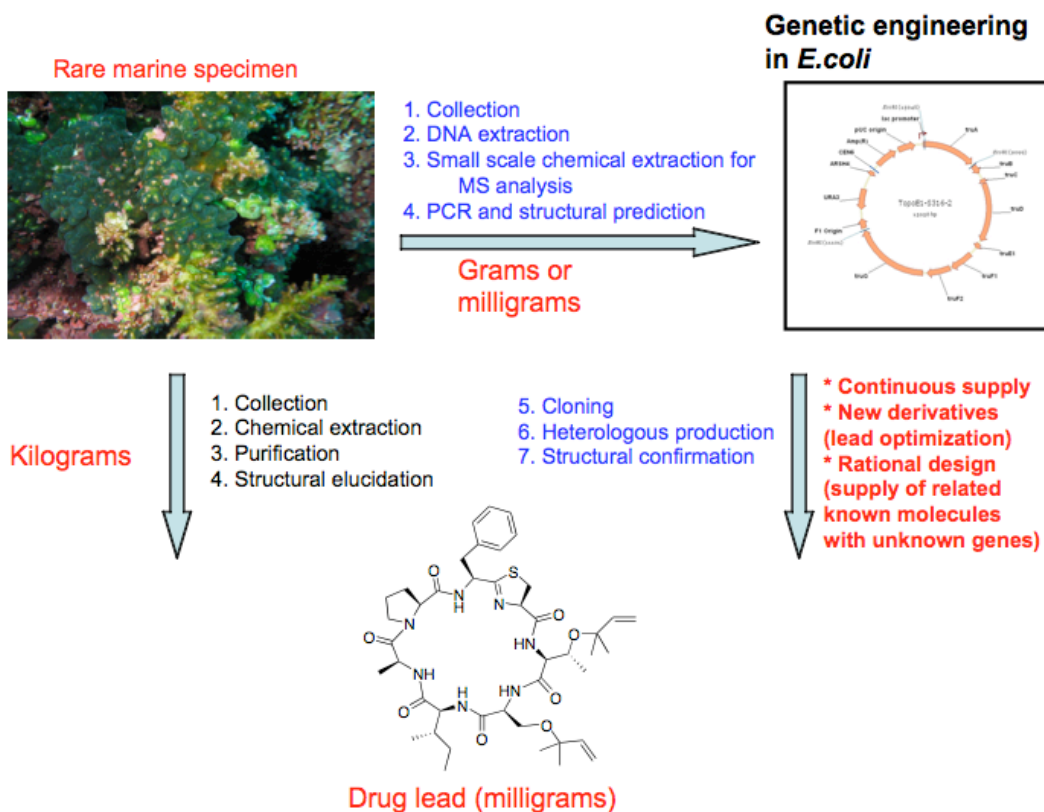

**Figure S2. Compounds produced by *tru*.** Schematic representations of some of the 6, 7, and 8-amino acid cyanobactins synthesized by *tru* are shown, indicating the broad substrate nature of the enzymes. Identical enzymes synthesize derivatives with all of the mutations shown.

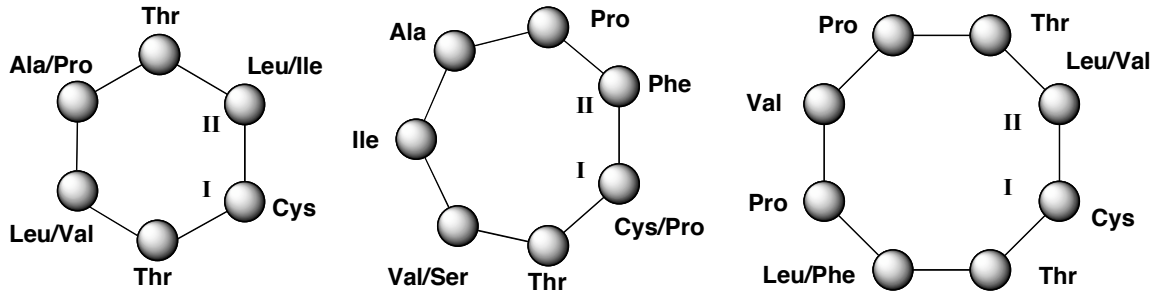

**Figure S3. FT-MS analysis of minimide.** Full FT-MS data are shown for the natural minimide. Two isomers are apparent (at 53 and 55 min) and have essentially identical exact masses and fragmentation patterns. The IRMPD fragmentation indicates loss of 2 prenyl groups.

100810FT\_MohamedDonia\_06-017\_repeat

8/10/2010 2:00:26 PM

RT: 0.00 - 58.95

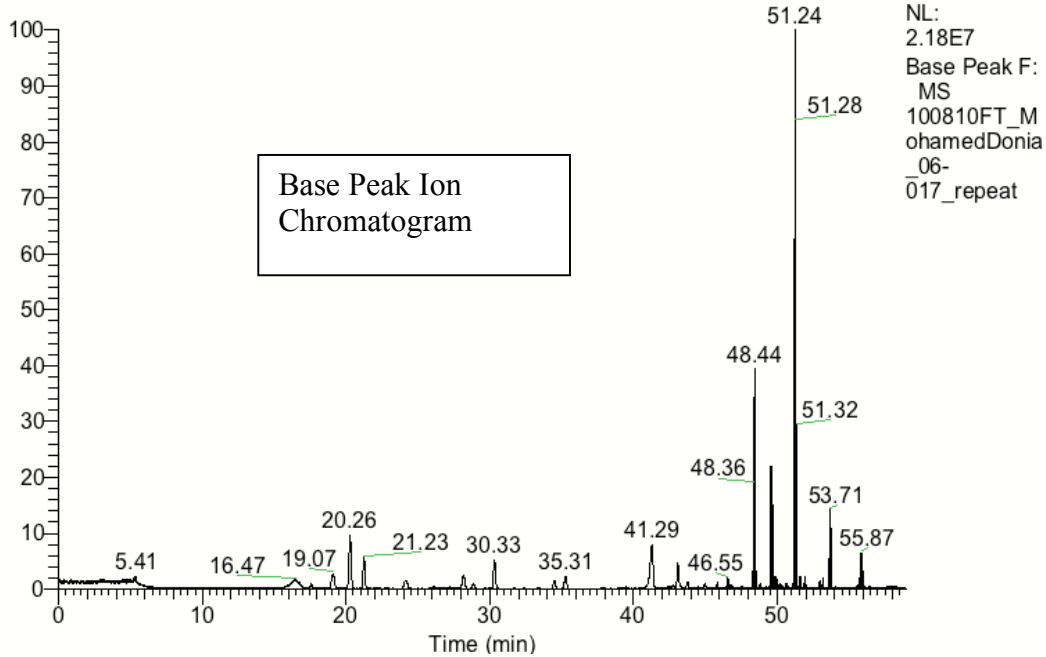

100810FT\_MohamedDonia\_06-017\_repeat

8/10/2010 2:00:26 PM

RT: 0.00 - 58.95

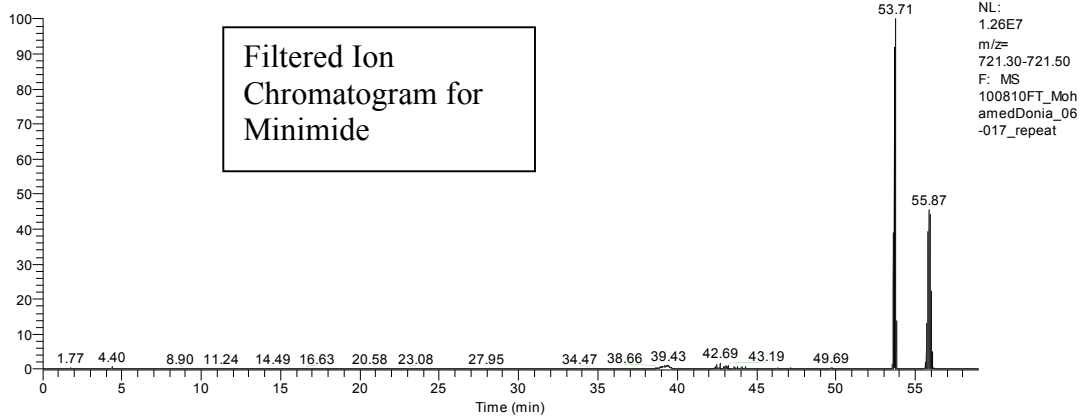

100810FT\_MohamedDonia\_06-017\_repeat#5386-5409 RT: 53.44-53.80 AV: 12 NL: 1.16E6  
T: FTMS + p NSI Full ms [ 350.00-1400.00]

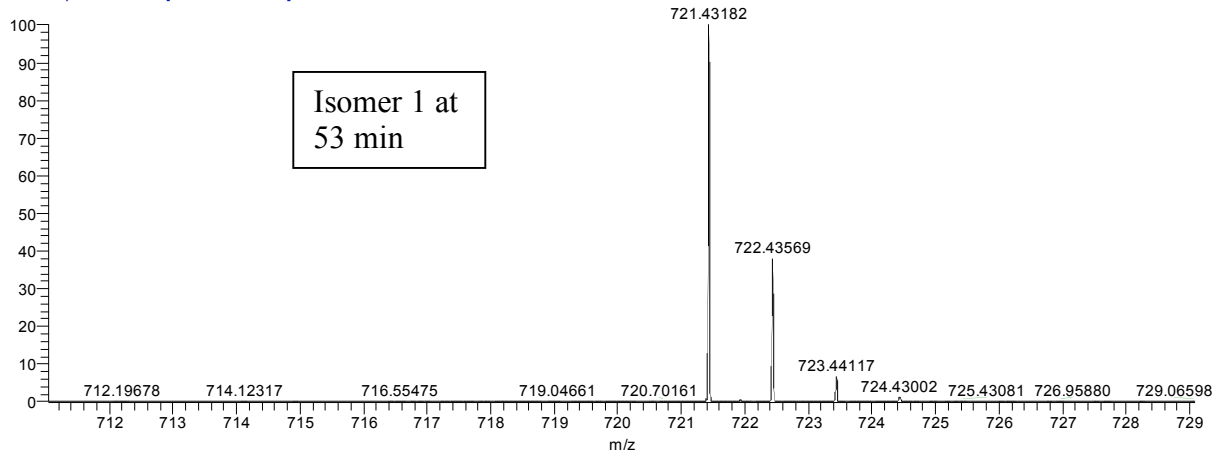

100810FT\_MohamedDonia\_06-017\_repeat#5505-5527 RT: 55.62-56.01 AV: 12 NL: 7.44E5  
T: FTMS + p NSI Full ms [ 350.00-1400.00]

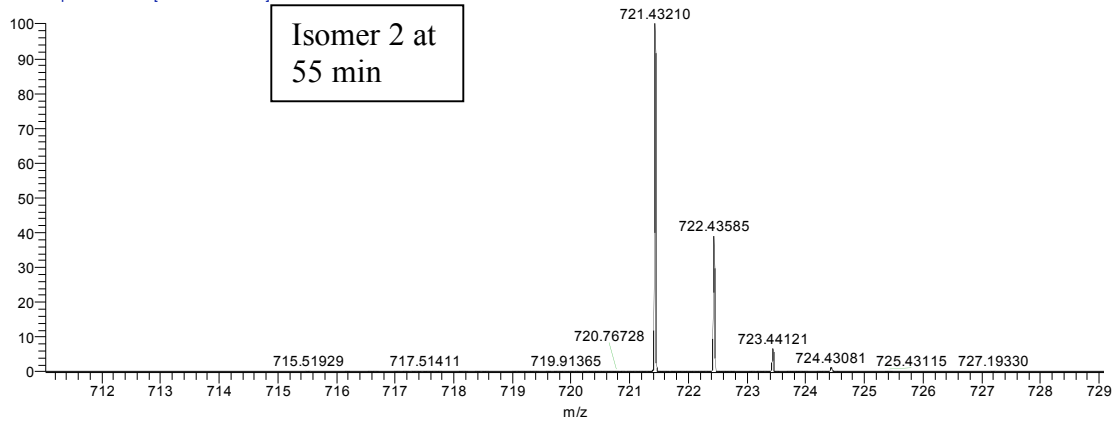

RT: 39.39 - 58.95

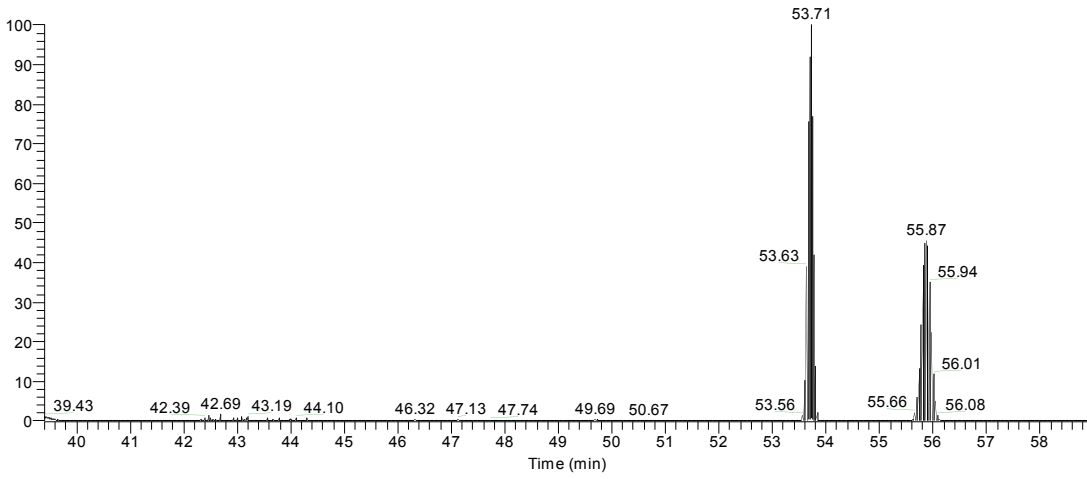

NL:  
1.26E7  
m/z=  
721.30000-  
721.50000 F:  
MS  
100810FT\_Moha  
medDonia\_06-  
017\_repeat

100810FT\_MohamedDonia\_06-017\_repeat #5396-5407 RT: 53.60-53.75 AV: 6 NL: 1.11E4  
T: FTMS + p NSI Full ms2 721.40@0.00 mpd@60.00 [mpd@100.00 -mpd@1500.00]

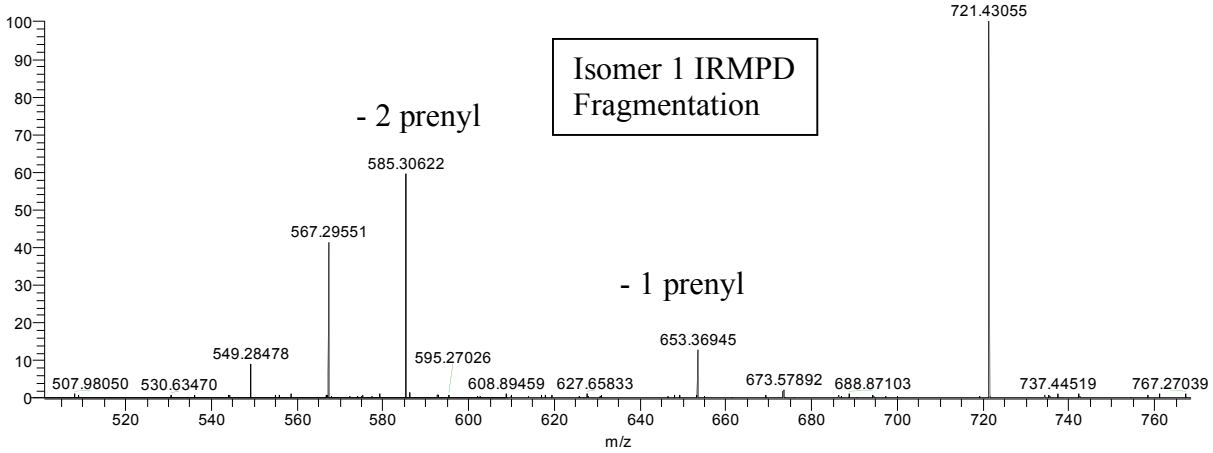

RT: 39.39 - 58.95

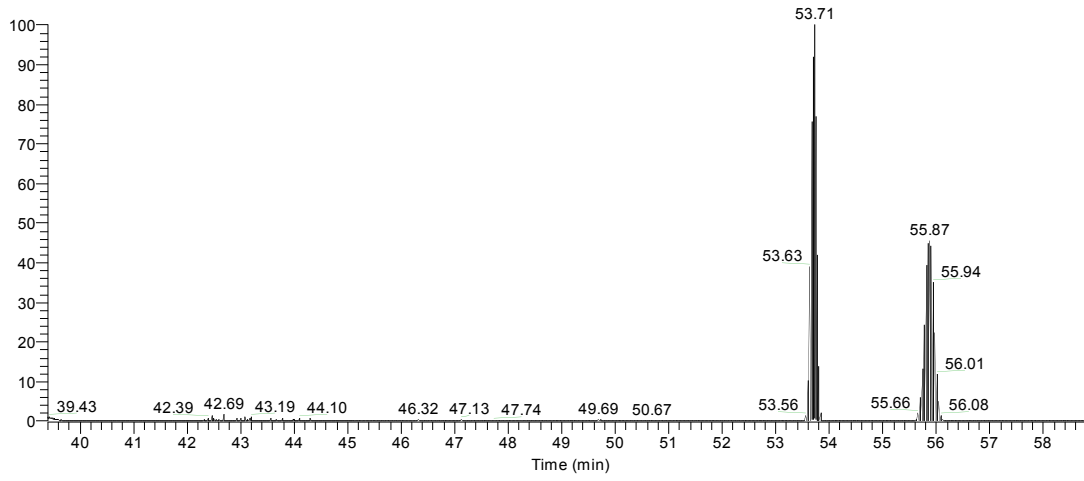

NL:  
1.26E7  
m/z=  
721.30000-  
721.50000 F:  
MS  
100810FT\_Moha  
medDonia\_06-  
017\_repeat

100810FT\_MohamedDonia\_06-017\_repeat#5510-5520 RT: 55.71-55.88 AV: 6 NL: 2.34E3  
T: FTMS + p NSI Full ms2 721.40@0.00 mpd@60.00 [ mpd@100.00 -mpd@1500.00 ]

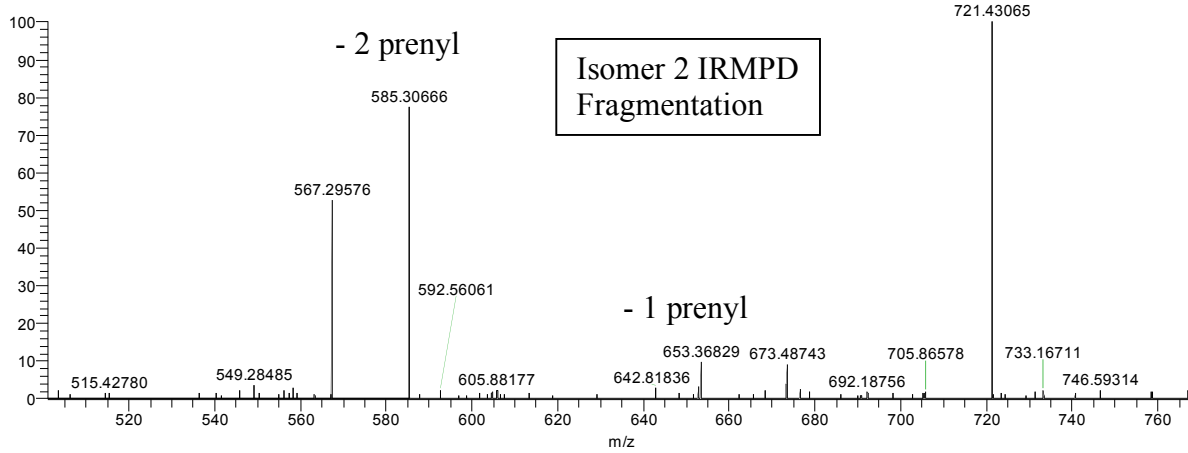

**Figure S4. *E. coli* expression systems for cyanobactins.** Black arrows represent the T7 promoter while red arrows represent the *lac* promoter. A) Every gene is under the control of the inducible T7 promoter. This system did not yield products with the *tru* pathway and was variable with the *pat* pathway. B) Half of the pathway is on one plasmid while the other half is on another, also under the control of the inducible T7 promoter. This system also failed to produce compounds. C) The whole pathway is on one operon under the control of the constitutive *lac* promoter. This pathway was functional and was optimized in these studies. D) The *tru* operon was co-expressed with *truE* precursor peptide gene to yield natural products and variants in the optimized system.

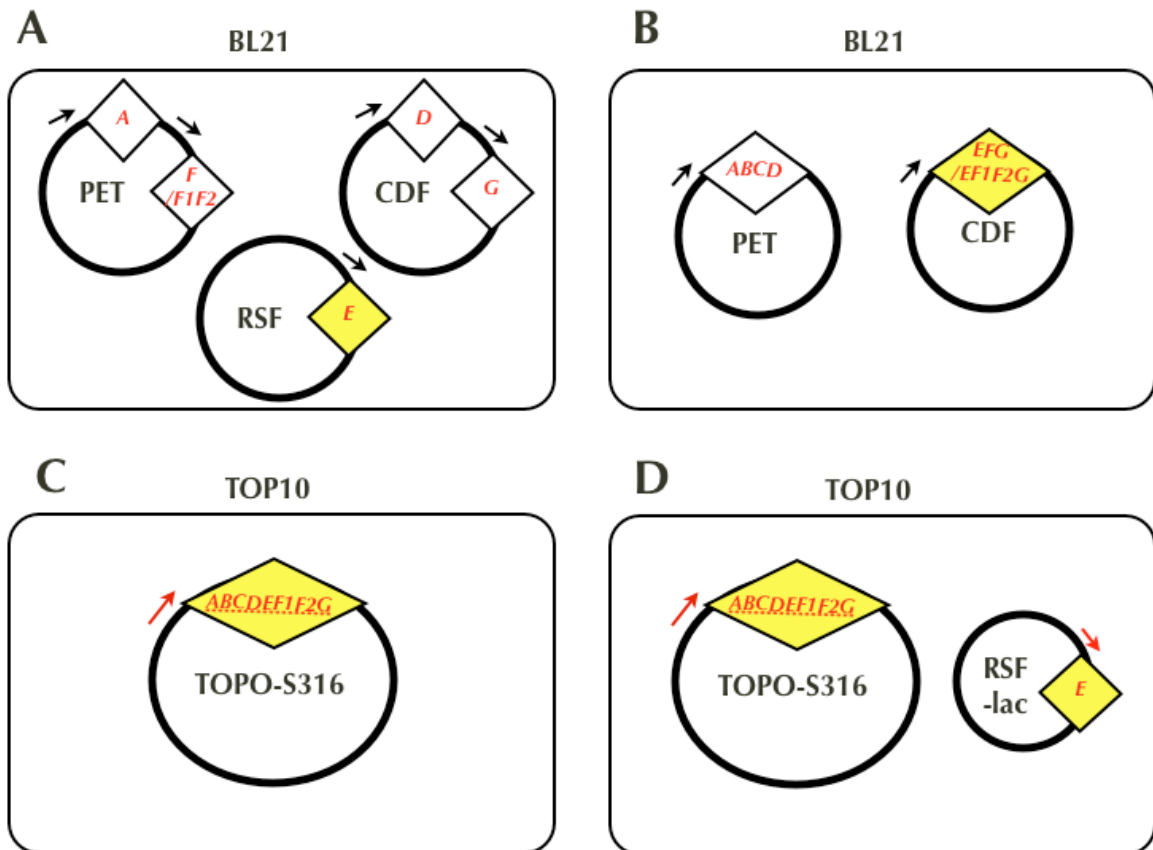

**Figure S5. Genetic engineering of a fluorescent fusion construct.** Middle, *gfp* was amplified from the pGFP-UV with primers homologous to the final gene of the *tru* pathway (*truG*). Homologous recombination in yeast was then used to construct the fusion construct. Left, restriction digests with *Nco*I showing the correct insertion. Right, two colonies of Top10 *E. coli* harboring the fusion construct show less fluorescence than the positive control (*gfp* only) and more than the non-fluorescent initial construct (negative control).

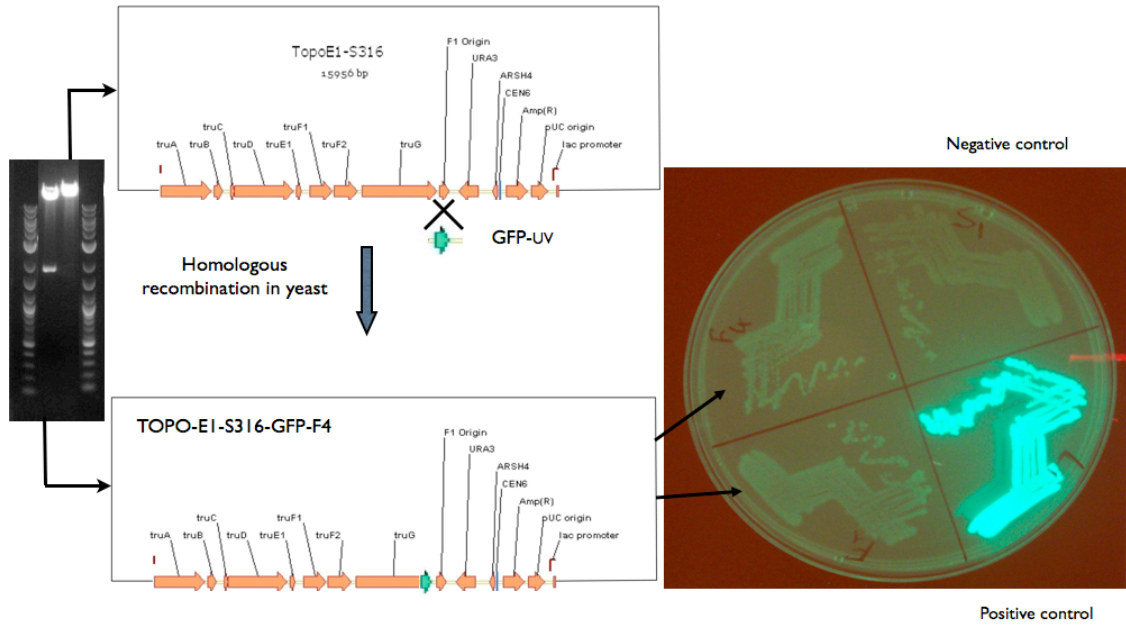



**Figure S6. Effect of media on expression levels.** A) Relative production levels of patellin 3 assessed by UPLCMS. B) Relative production levels of patellin 2 assessed by UPLCMS. The top panel represents the expression in LB and the bottom represents the expression in 2XYT. The same cell line, colonies, expression conditions and extraction procedures were used for these two experiments. The yield in 2XYT is higher than that in LB.

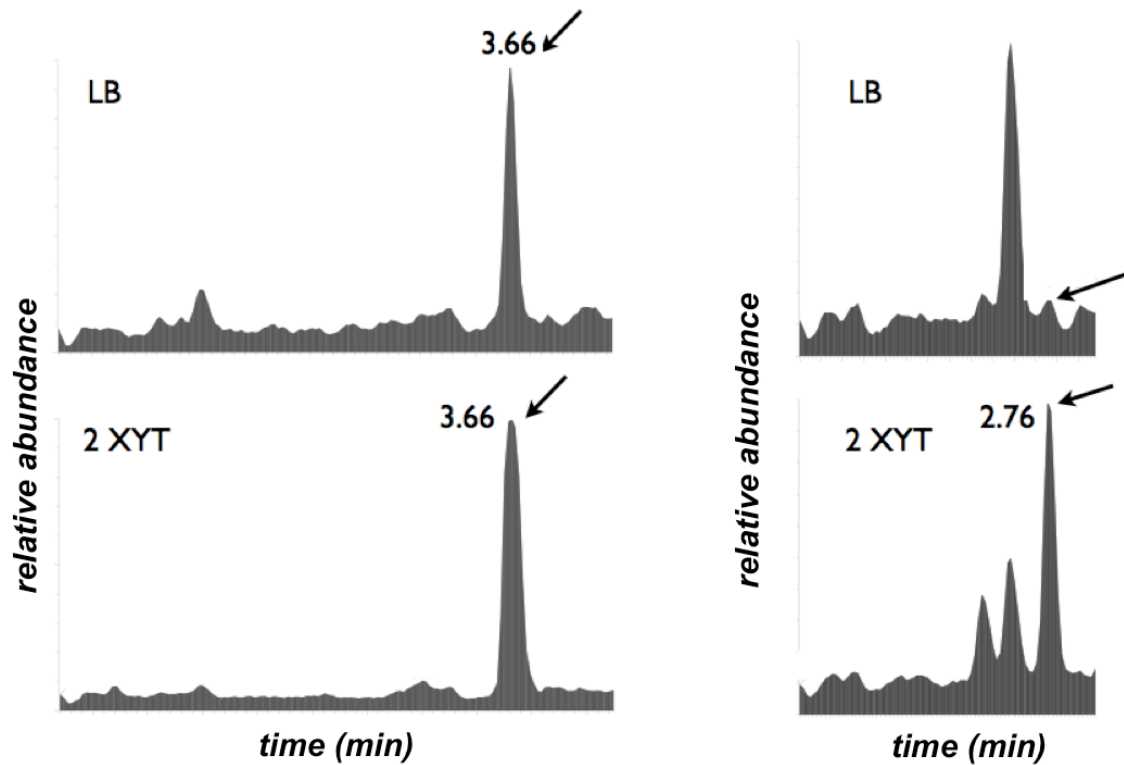

**Table S1. Constructs reported in this study.**

|    | Resulting vector  | Gene content     | Annealing temperature | Extension time | Forward primer | Reverse primer | Parent vector        |
|----|-------------------|------------------|-----------------------|----------------|----------------|----------------|----------------------|
| 1  | pPET-patApatF     | patA (MCS1)      | 52                    | 2.5 min        | patA-F-BspHI   | patA-R-NotI    | pPET-Duet (Novagen)  |
|    |                   | patF (MCS2)      | 52                    | 1 min          | patF-F-NdeI    | patF-R-KpnI    |                      |
| 2  | pPET-truApatF     | truA (MCS1)      | 52                    | 2.5 min        | patA-F-BspHI   | truA-R-EagI    | pPET-Duet (Novagen)  |
|    |                   | patF (MCS2)      | 52                    | 1 min          | patF-F-NdeI    | patF-R-KpnI    |                      |
| 3  | pCDF-patDpatG     | patD (MCS1)      | 55                    | 2.5 min        | patD-F-BspHI   | patD-R-NotI    | pCDF-Duet (Novagen)  |
|    |                   | patG (MCS2)      | 54                    | 4 min          | patG-F-NdeI    | patG-R-KpnI    |                      |
| 4  | pACYC-patAtruF1F2 | patA (MCS1)      | 52                    | 2.5 min        | patA-F-BspHI   | patA-R-NotI    | pACYC-Duet (Novagen) |
|    |                   | truF1F2 (MCS2)   | 52                    | 2 min          | truF1-F-KpnI   | truF2-R-KpnI   |                      |
| 5  | pACYC-patAtruF1   | patA (MCS1)      | 52                    | 2.5 min        | patA-F-BspHI   | patA-R-NotI    | pACYC-Duet (Novagen) |
|    |                   | truF1 (MCS2)     | 52                    | 1 min          | truF1-F-KpnI   | truF1-R-KpnI   |                      |
| 6  | pACYC-patApatF    | patA (MCS1)      | 52                    | 2.5 min        | patA-F-BspHI   | patA-R-NotI    | pACYC-Duet (Novagen) |
|    |                   | patF (MCS2)      | 52                    | 1 min          | patF-F-KpnI    | patF-R-KpnI    |                      |
| 7  | pRSF-patE2        | patE2 (MCS2)     | 52                    | 30 sec         | patE-F-NdeI    | patE-F-KpnI    | pRSF-Duet (Novagen)  |
| 8  | pPET-truAtruF1F2X | truA (MCS1)      | 52                    | 2.5 min        | patA-F-BspHI   | truA-R-EagI    | pPET-Duet (Novagen)  |
|    |                   | truF1F2          | 52                    | 2 min          | truF1-F-KpnI   | truF2-R-KpnI   |                      |
| 9  | pCDF-truDtruG     | truD (MCS1)      | 56                    | 2.5 min        | truD-F-BspHI   | truD-R-EagI    | pCDF-Duet (Novagen)  |
|    |                   | truG (MCS2)      | 54                    | 3.5 min        | truG-F-NdeI    | patG-R-KpnI    |                      |
| 10 | pRSF-truE1        | truE1            | 52                    | 30 sec         | patE-F-NdeI    | truE-R-KpnI    | pRSF-Duet (Novagen)  |
| 11 | pRSF-truE2        | truE2            | 52                    | 30 sec         | patE-F-NdeI    | truE-R-KpnI    | pRSF-Duet (Novagen)  |
| 12 | pPET-patI         | patApatBpatCpatD | 52                    | 6 min          | patA-F-NcoI    | patD-R-NotI    | pPET-Duet (Novagen)  |
| 13 | pCDF-patI         | patE2patFpatG    | 52                    | 6 min          | patE-F-NdeI    | patG-R-KpnI    | pCDF-Duet (Novagen)  |

|    |                           |                     |                                                                    |       |              |             |                     |
|----|---------------------------|---------------------|--------------------------------------------------------------------|-------|--------------|-------------|---------------------|
| 14 | pCDF-truII                | truE1truF1truF2truG | 52                                                                 | 6 min | truF1-F-KpnI | patG-R-KpnI | pCDF-Duet (Novagen) |
| 15 | TOPO-E1                   | tru1                | Constructed by TOPO-cloning                                        |       |              |             | pCR2.1 (Invitrogen) |
| 16 | TOPO-E1-Dkan              | tru1                | Constructed by deleting the kanamycin resistance gene from TOPO-E1 |       |              |             | NA                  |
| 17 | TOPO-E1-S316              | tru1                | Constructed by yeast recombination <sup>12</sup>                   |       |              |             | NA                  |
| 18 | TOPO-E1-S316-TK           | tru2                | Constructed by yeast recombination <sup>12</sup>                   |       |              |             | NA                  |
| 19 | TOPO-E1-S316-GFP-F4       | tru1-GFP            | Constructed by yeast recombination (explained above)               |       |              |             | NA                  |
| 20 | pRSF-DlacI-truE1          | truE1               | Constructed by deleting <i>lacI</i> from pRSF-truE2                |       |              |             | NA                  |
| 21 | pRSF-DlacI-lacp-truE1     | truE1               | Constructed by cloning lac promoter into pRSF-DlacI-truE2          |       |              |             | NA                  |
| 22 | pRSF-DlacI-lacp-truE-TK   | truE+trunkamide     | Constructed by cloning lac promoter into pRSF-DlacI-truE2          |       |              |             | NA                  |
| 23 | pRSF-DlacI-lacp-truEminim | TruE + minimide     | Constructed by mutational PCR                                      |       |              |             | NA                  |

**Table S2. Sequences of the primers used in this study.** The underlined sequence is the homologous sequence designed to allow the recombination in yeast.

|    | Primer name       | Sequence (5'-3')                                              |
|----|-------------------|---------------------------------------------------------------|
| 1  | patA-F-BspHI      | ATCATGAATAGAGATATTTTGCGAAC                                    |
| 2  | patA-F-NcoI       | AACCATGGATAGAGATATTTTGCGAAC                                   |
| 3  | patA-R-EagI       | TCGGCCGTTCCCTTAGTAAGAAGAAGACCAAG                              |
| 4  | patD-F-BspHI      | TTCATGAACCCAACCGCGCTCCAAATTAAG                                |
| 5  | patD-R-NotI       | GCCGCGGCCGCAAACCTTGAAAATGCTTAAAACG                            |
| 6  | patE-F-NdeI       | AACATATGGACTTAAATTGACAGGCTTC                                  |
| 7  | patE-R-KpnI       | ATGACTAGGTACCTGAGTCAATGCAAATG                                 |
| 8  | patF-F-NdeI       | AACATATGGACTTAAATTGACAGGCTTC                                  |
| 9  | patF-R-KpnI       | ATGACTAGGTACCTGAGTCAATGCAAATG                                 |
| 10 | patG-F-NdeI       | CCATATGATCACGATAGACTACCCTTTC                                  |
| 11 | patG-R-KpnI       | CGGTACCCAATAACTACTTTGAGACGGTG                                 |
| 12 | truA-R-EagI       | AACGGCCGGTTAGTAAGAAGAAGACCAAGAACG                             |
| 13 | truD-F-BspHI      | TTCATGCAACCAACCGCCCTCCAAATTAAG                                |
| 14 | truD-R-EagI       | AACGGCCGTTAAAATGGCATCGGTGTAGGGTTC                             |
| 15 | truF1-F-NdeI      | AGGACATATGATTATGACTACTACTTGGCCAG                              |
| 16 | truF1-R-KpnI      | TTTGGTACCCTATACCGCCTTGCGATAATAG                               |
| 17 | truF2-R-KpnI      | TTTGGTACCTCAGACTCTCATCATTCTTGACT                              |
| 18 | truG-F-NdeI       | TTCATATGAGTCGTCATCCTTTTAATATTTGCC                             |
| 19 | truG-R-KpnI       | CGGTACCCAATAACTACTTTGAGACGGTG                                 |
| 20 | truE-F-NdeI       | AACATATGGACTTAAATTGACAGGCTTC                                  |
| 21 | truE-R-KpnI       | AATTCGGTACCTTAGTCGTCGTAAGAGCAGAG                              |
| 22 | TruG-LacP-GFP-F   | <u>TTATTGGGGTACCGAAGGGCGAAAGCGGGCAGT</u><br>GAGCGCAA          |
| 23 | TruG-Fusion-GFP-F | <u>CCTGGTAAAGGCACCGTCTCAAAGATGAGTAAA</u><br>GGAGAAGAACTTTTCAC |
| 24 | GFP-F1Origin-R    | <u>ACTGTTGGGAAGGGCGATCGGTAGTTGGAATTC</u><br>ATTATTTGTAGAGCTC  |

**Table S3. Compounds synthesized in this study.** Compounds obtained and validated from *E. coli* expression experiments are listed below.

| Compound   | Expression construct | Source                         | Sequence |
|------------|----------------------|--------------------------------|----------|
| Trunkamide | Operon and pRSF      | Known ascidian natural product | TSIAPFC  |
| Patellin 2 | Operon               | Known ascidian natural product | TVPTLC   |
| Patellin 3 | Operon and pRSF      | Known ascidian natural product | TLPVPTLC |
| Patellin 6 | Operon               | Known ascidian natural product | TFPVPTVC |
| Minimide   | pRSF                 | New ascidian natural product   | TLATIC   |
